# Supplementary material for: A versatile synthetic approach for the synthesis of CoO, CoxC, and Co based nanocomposites: tuning kinetics and crystal phase with different polyhydric alcohols
Source: Royal Society of Chemistry journal article supplement (doi:10.1039/c4ce00931b), 2014-01-01
Supplement: c4ce00931b1.pdf [file c4ce00931b1.pdf]

**A Versatile Synthetic Approach for the Synthesis of CoO, CoxC, and Co based Nanocomposites: Tuning Kinetics and Crystal Phase with Different Polyhydric Alcohols**

Zachary J. Huba and Everett E. Carpenter\*

Department of Chemistry, Virginia Commonwealth University, Richmond, VA 23284,  
USA E-mail: [ecarpenter2@vcu.edu](mailto:ecarpenter2@vcu.edu)

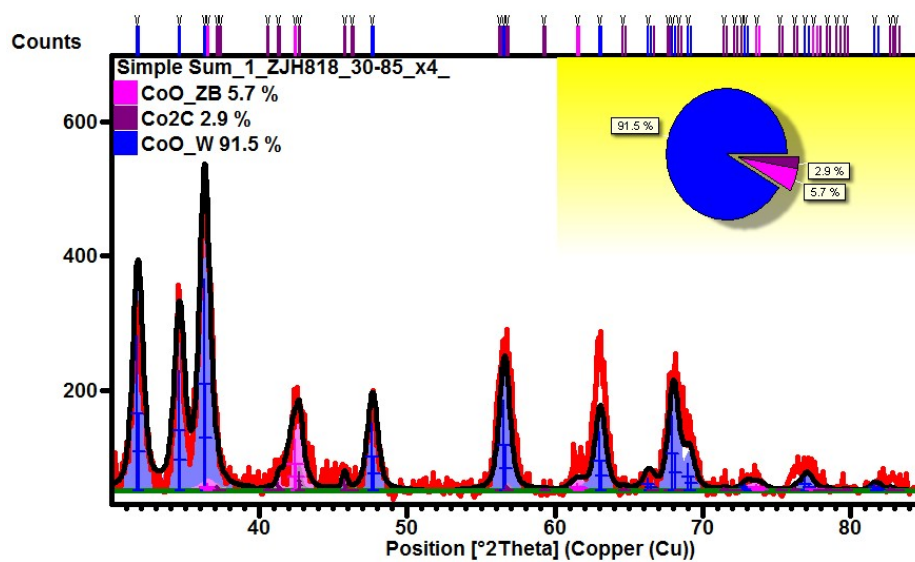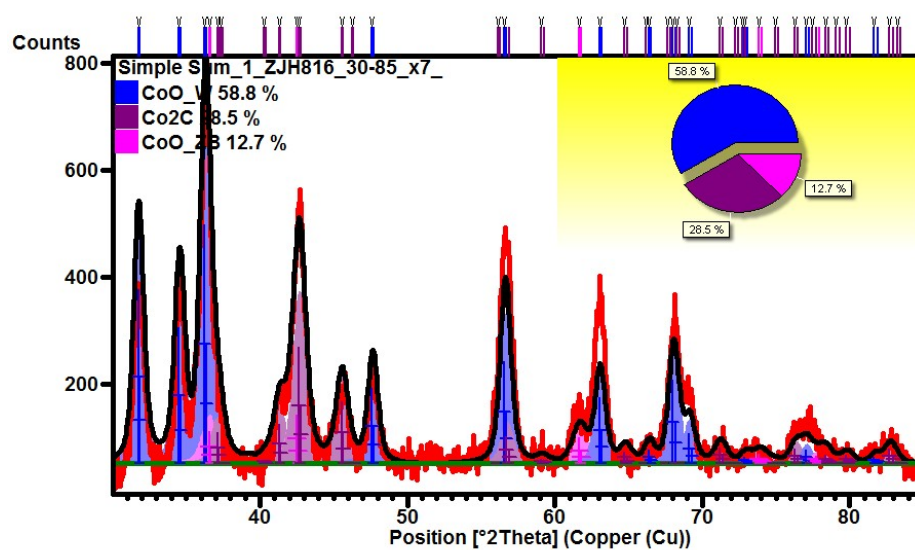

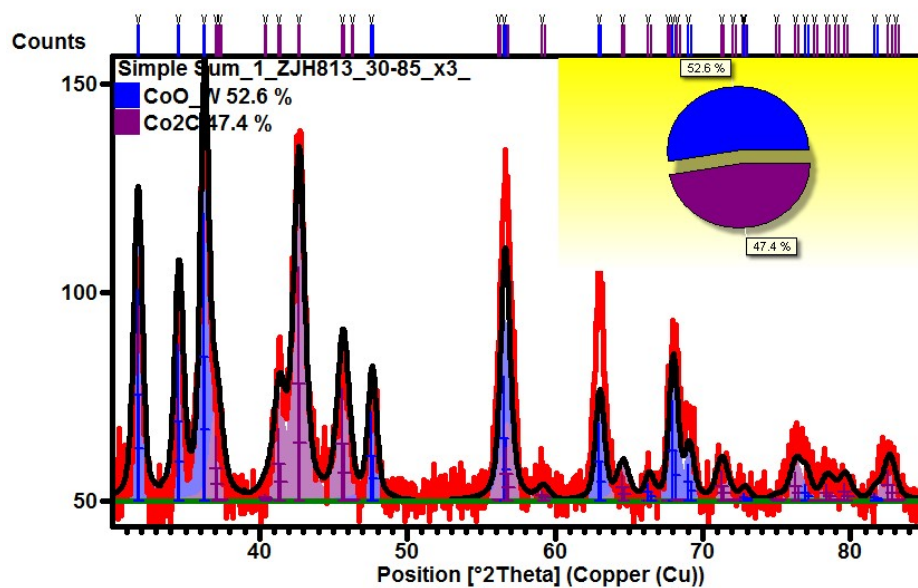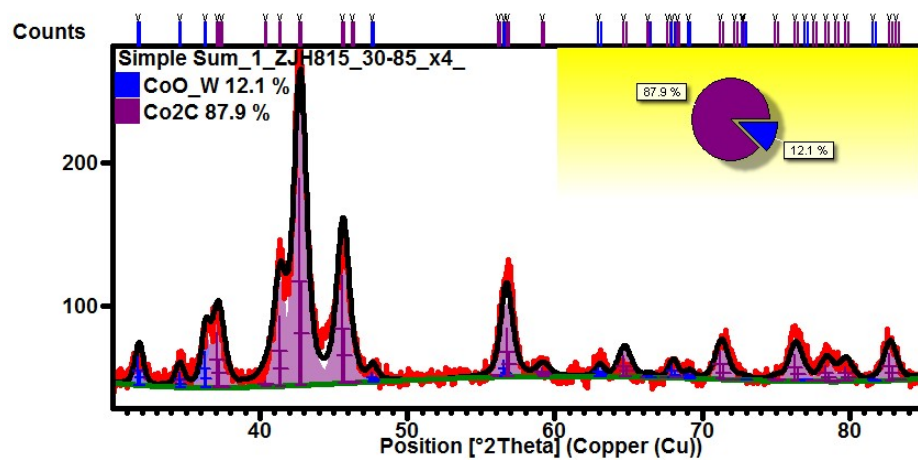

**S1. XRD fits for particles synthesized in 10 mL of 4-EG and 12 mL of oleylamine. Samples start at a 15 min reaction time (top) and progress to 1 hour, 2 hours, and 4 hours (bottom)**

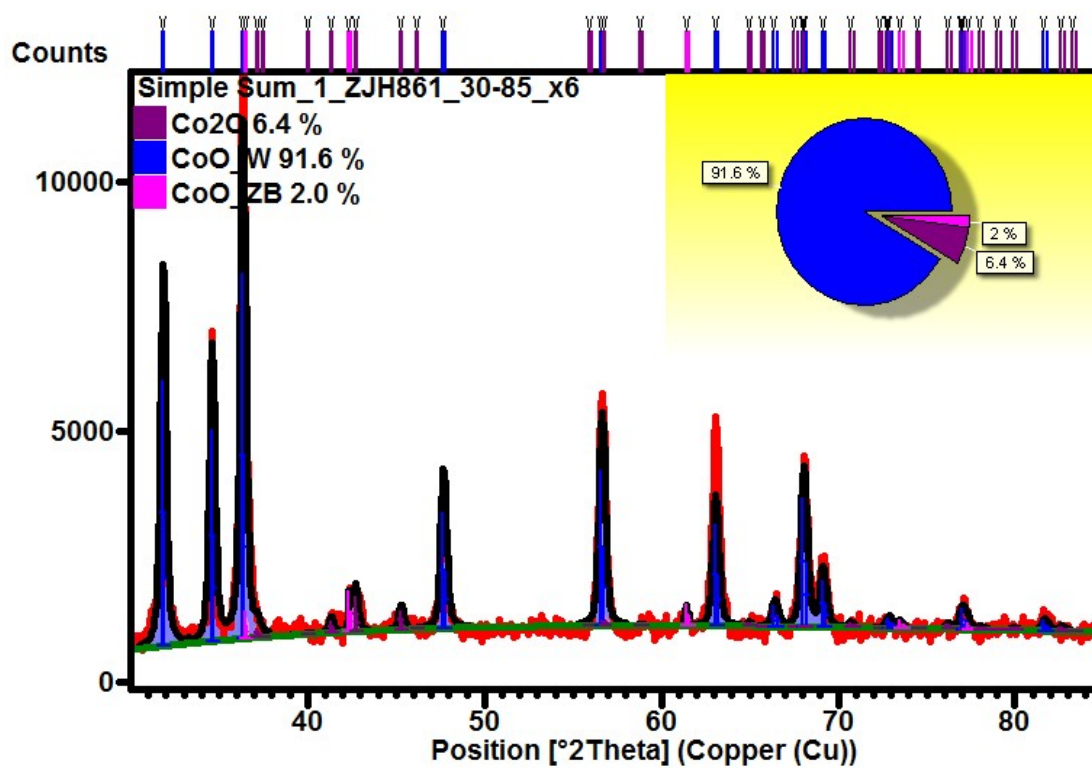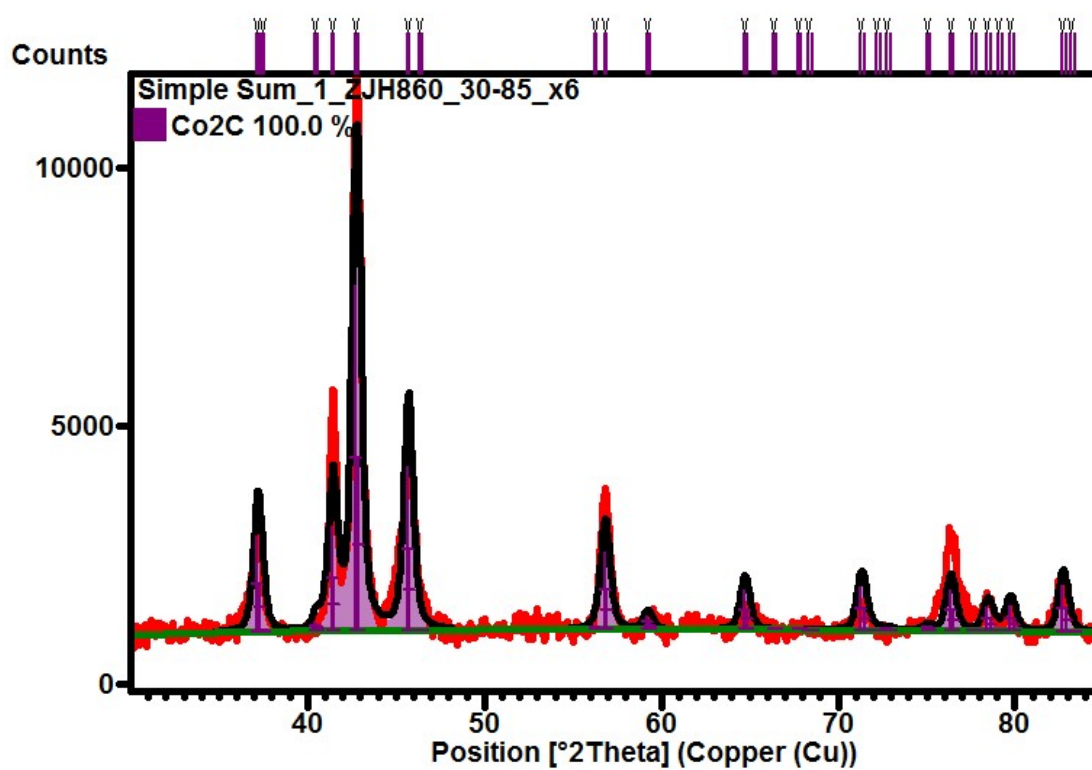

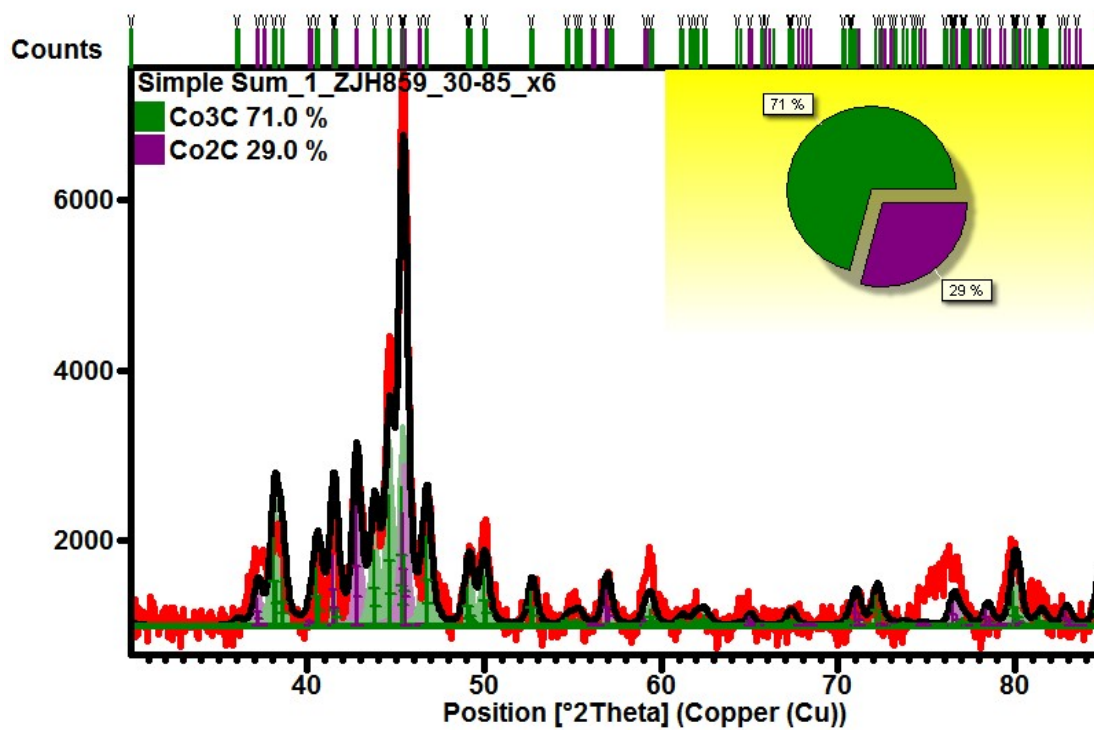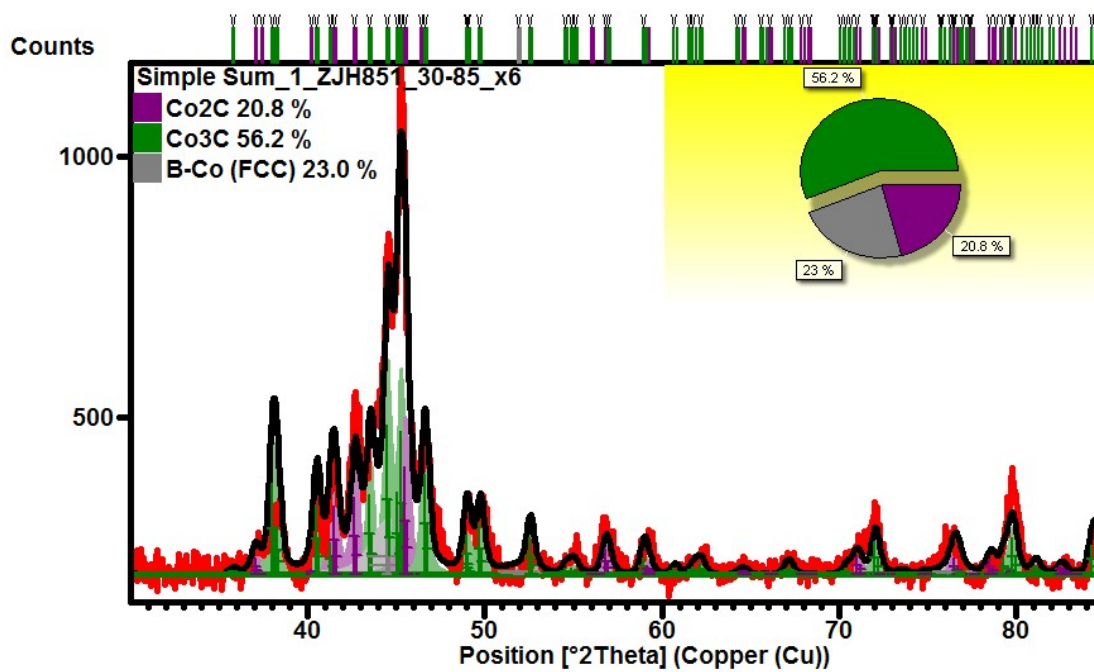

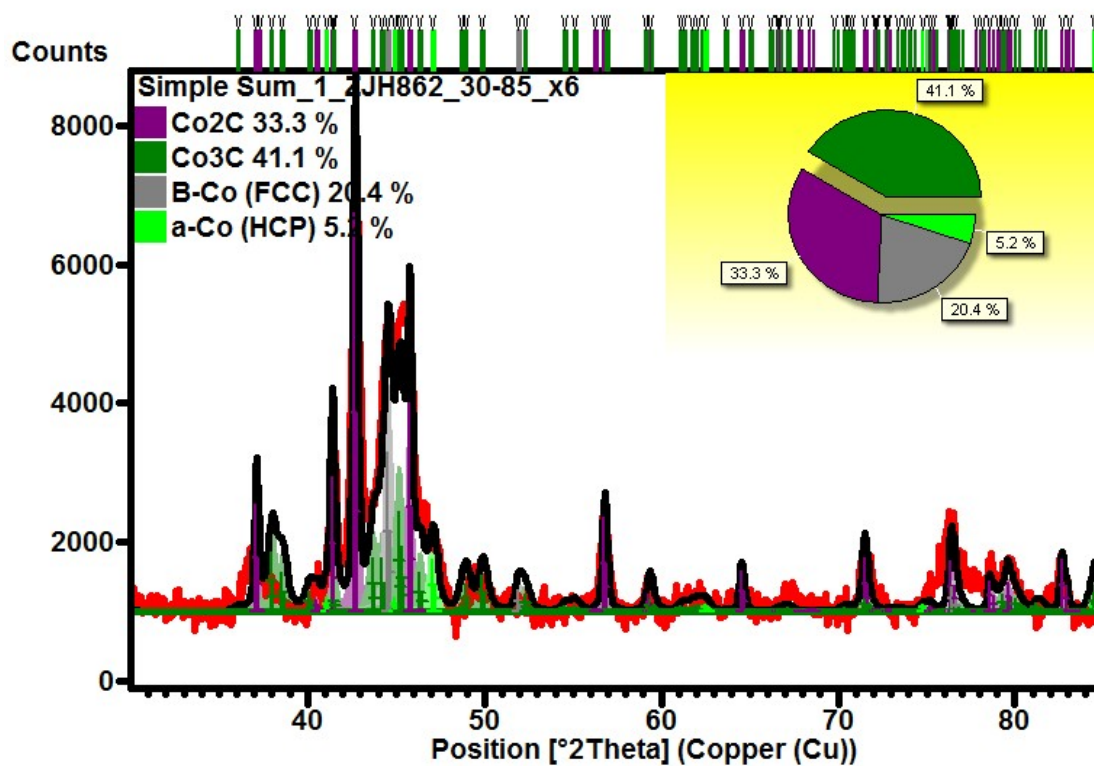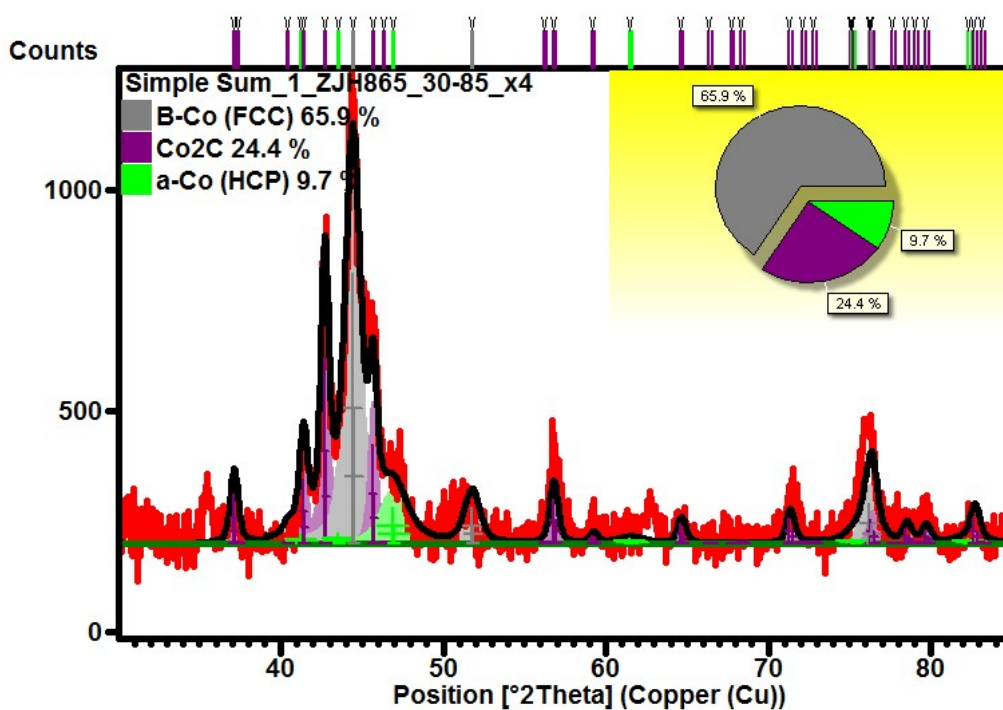

S2. XRD fits for particles synthesized using various amounts of 3-EG.. Samples start at a 2 mL 3-EG time (top) and progress to 3 mL, 4 mL, 5 mL, 6 mL and 7 mL (bottom).

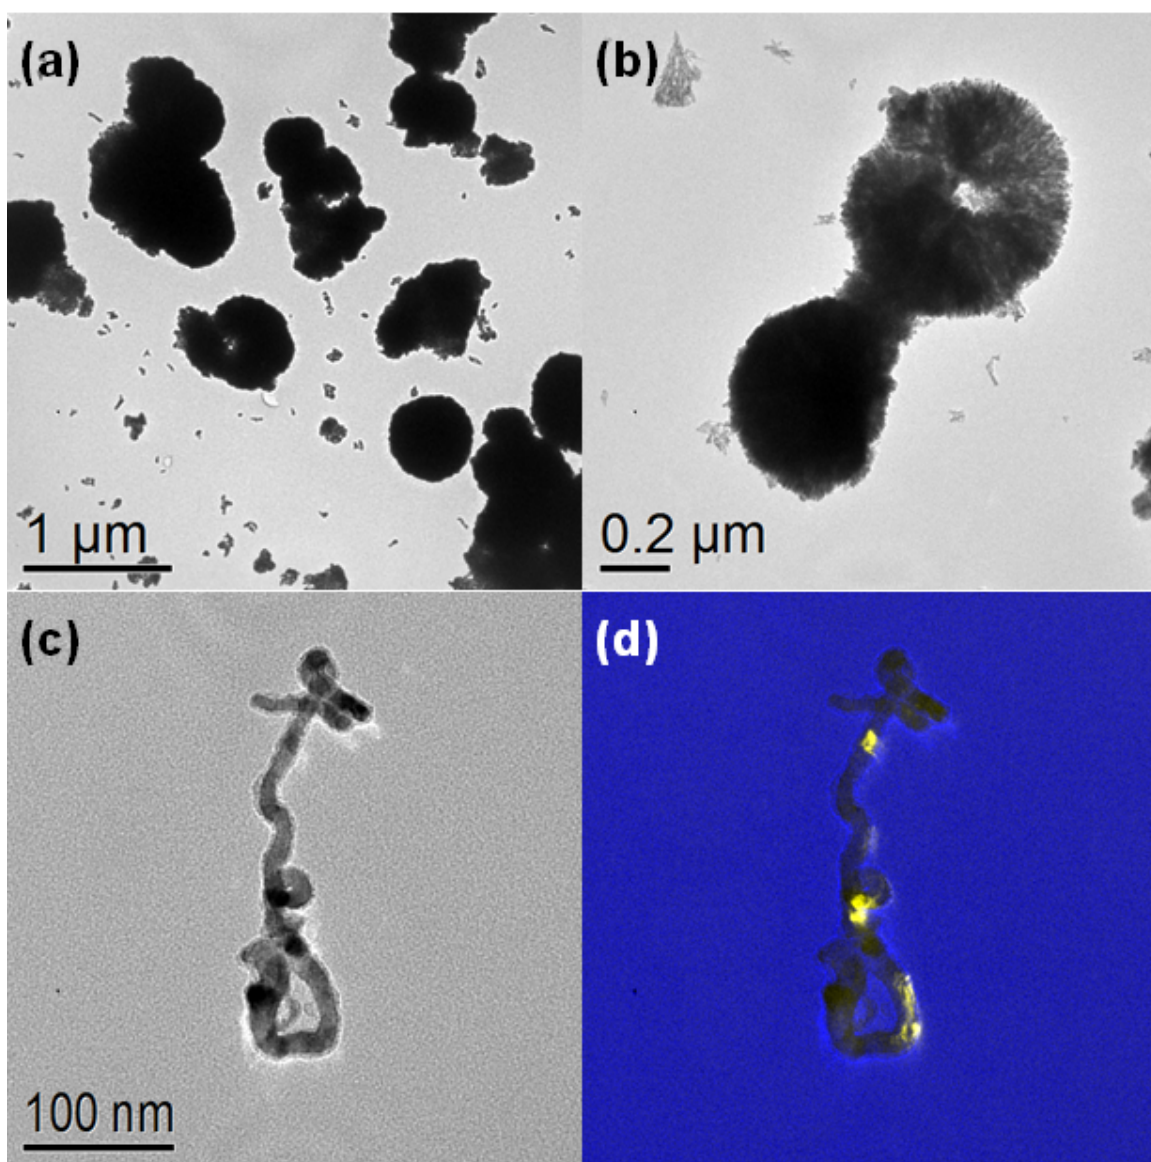

**S3. (a,b) TEM images of large, densely agglomerated particles found after a 4 hour reaction. (c,d) Bright field and dark field images, displaying the presence of individual crystallites embedded in the carbon structures.**

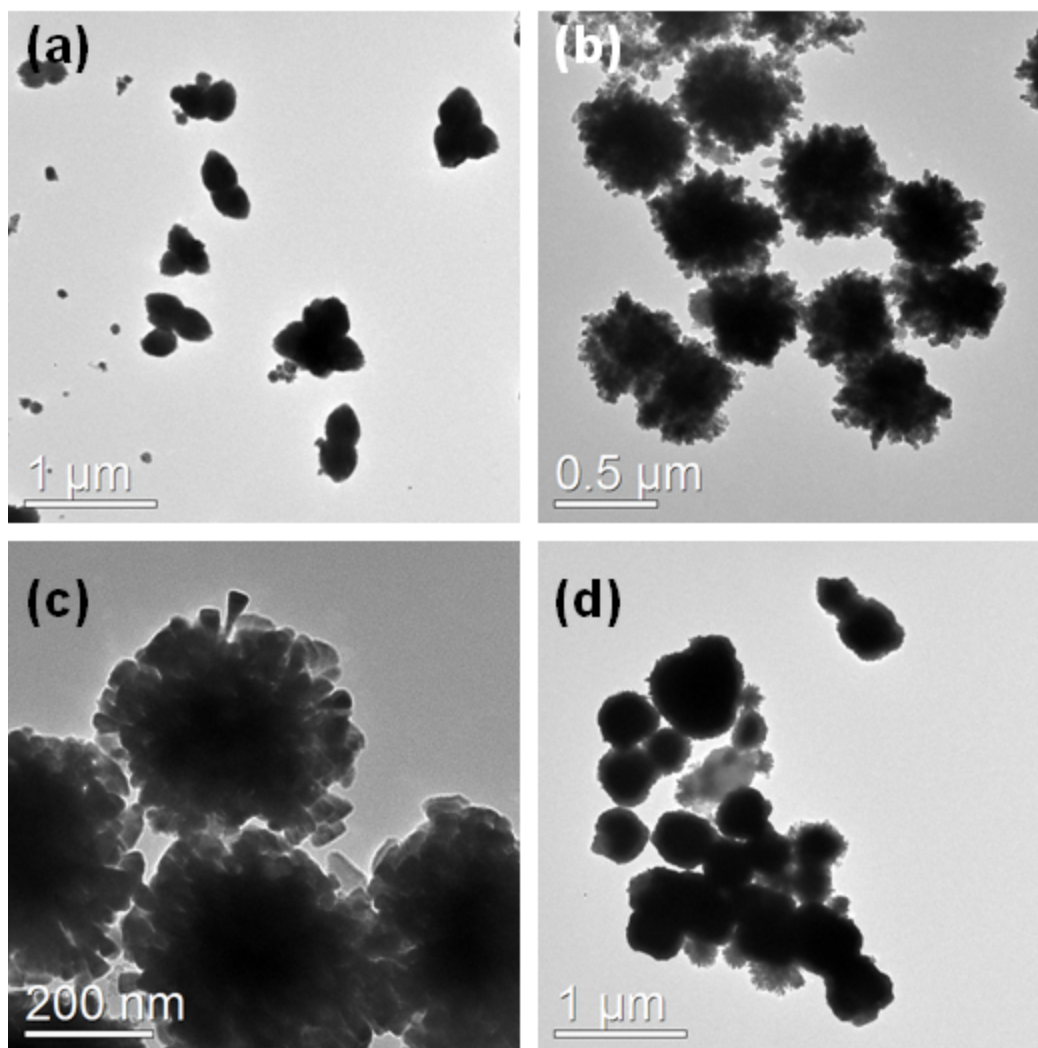

**S4. TEM images of particles synthesized at various amounts of 3-EG: (a) 2 mL, (b) 3 mL, (c) 4 mL, and (d) 7 mL**

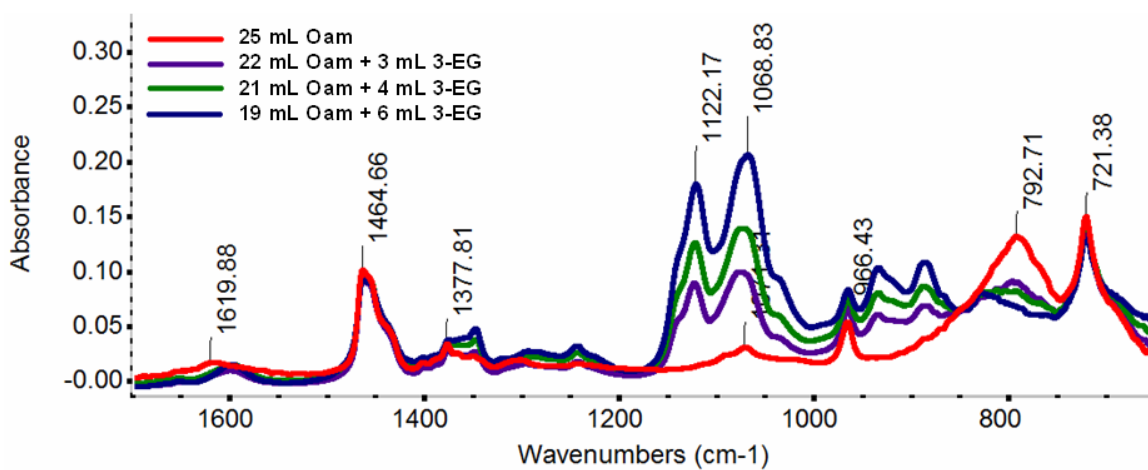

**S5. FT-IR spectra of differing ratios of 3-EG to oleylamine, prior to the addition of cobalt precursor, with peaks labeled.**

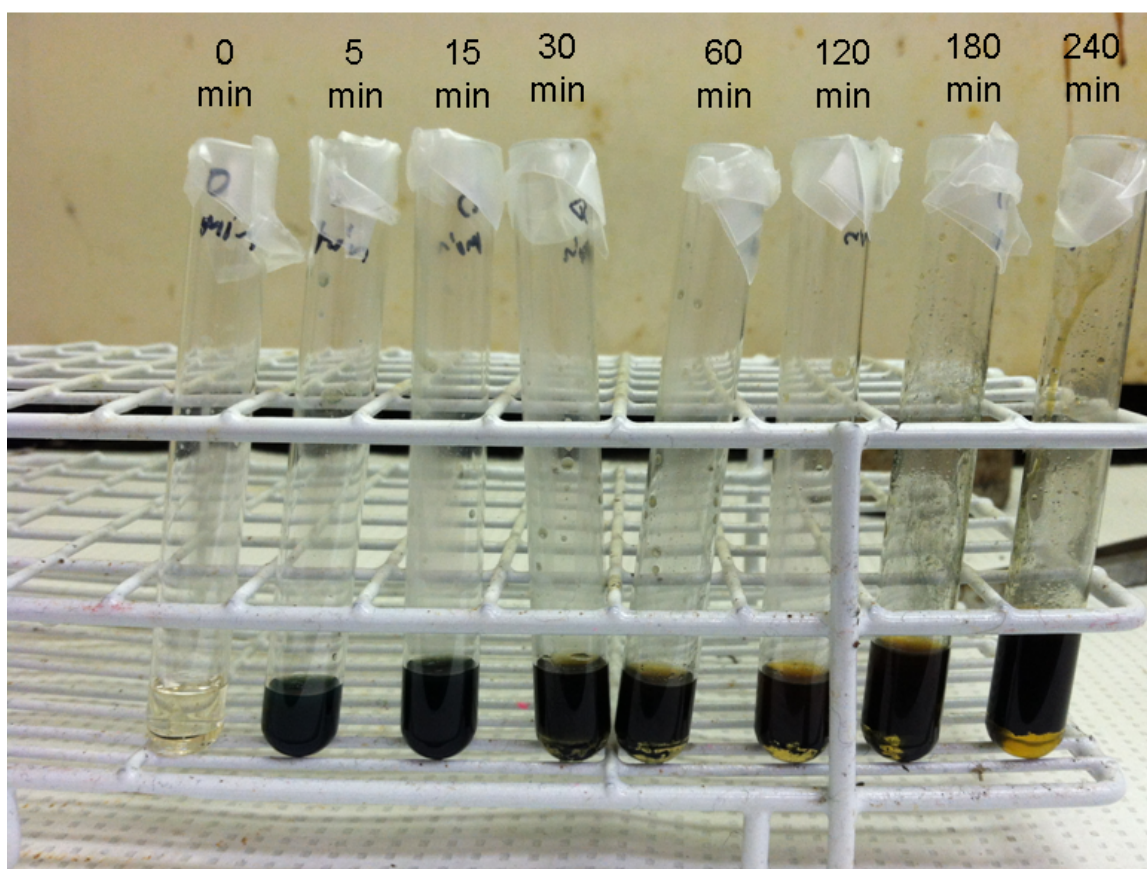

**S6. Picture of aliquots taken from a single reaction at various times. Aliquots collected at times greater than 15 minutes, showed a two phase nature, with an organic phase on top and aqueous phase on the bottom.**

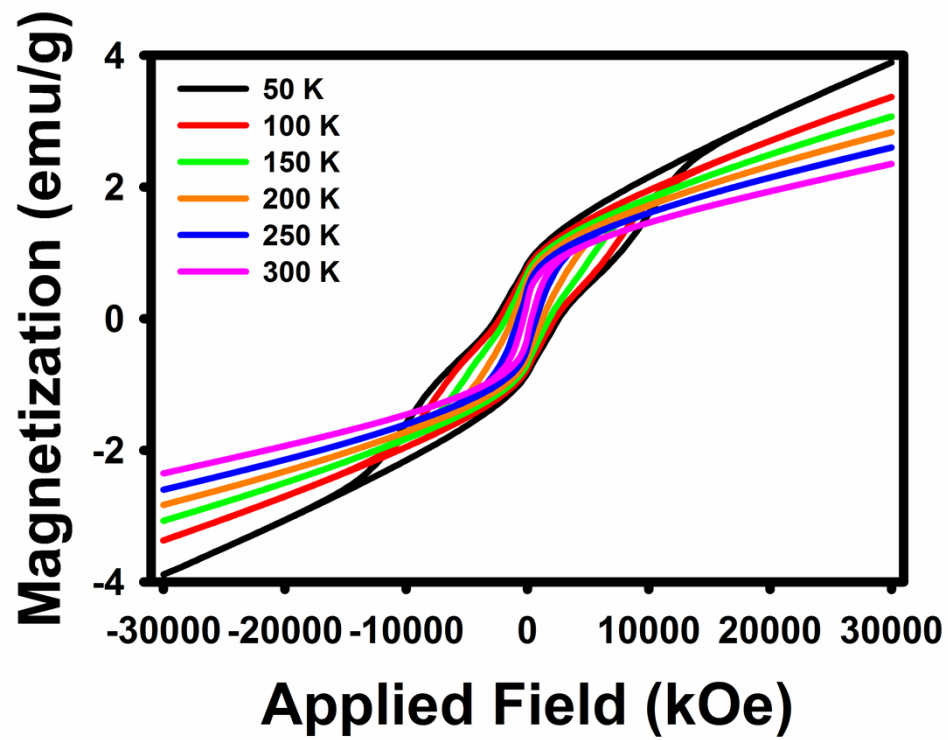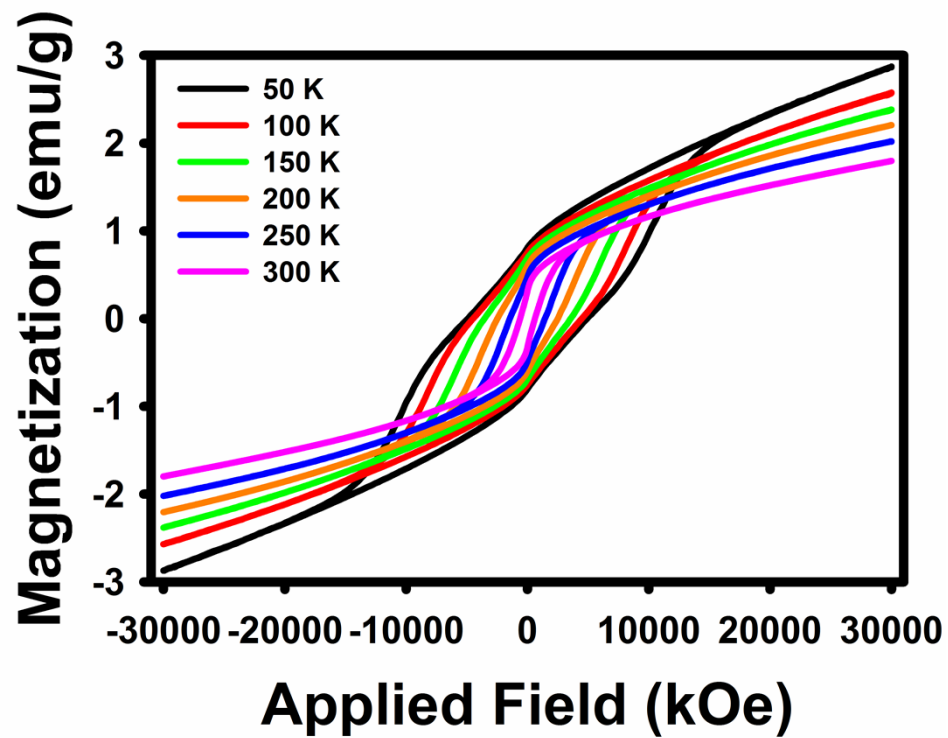

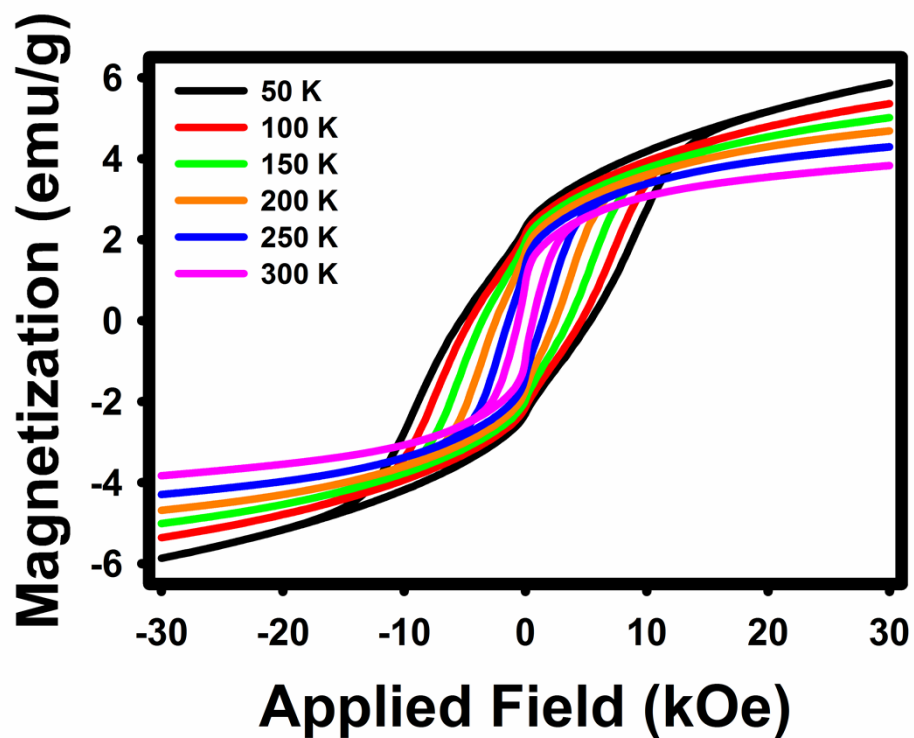

S7. M(H) curves for CoO/Co<sub>2</sub>C samples synthesized in 10 mL 4-EG and 15 mL oleylamine for reaction times of 1 hour (top), 2 hours (middle), and 4 hours (bottom).

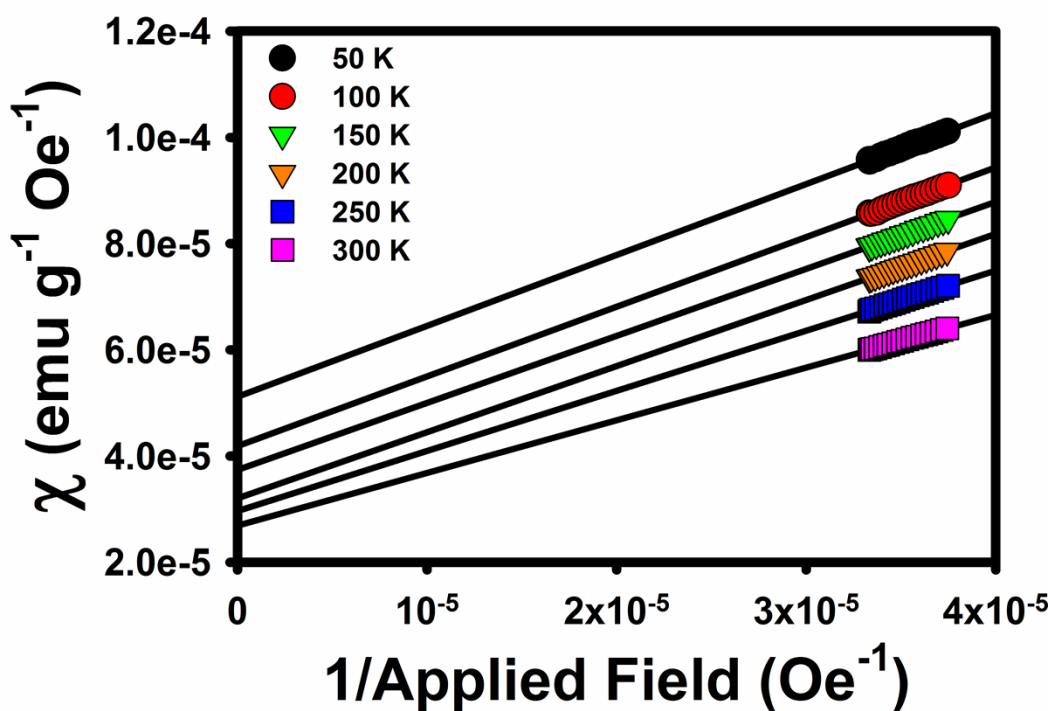

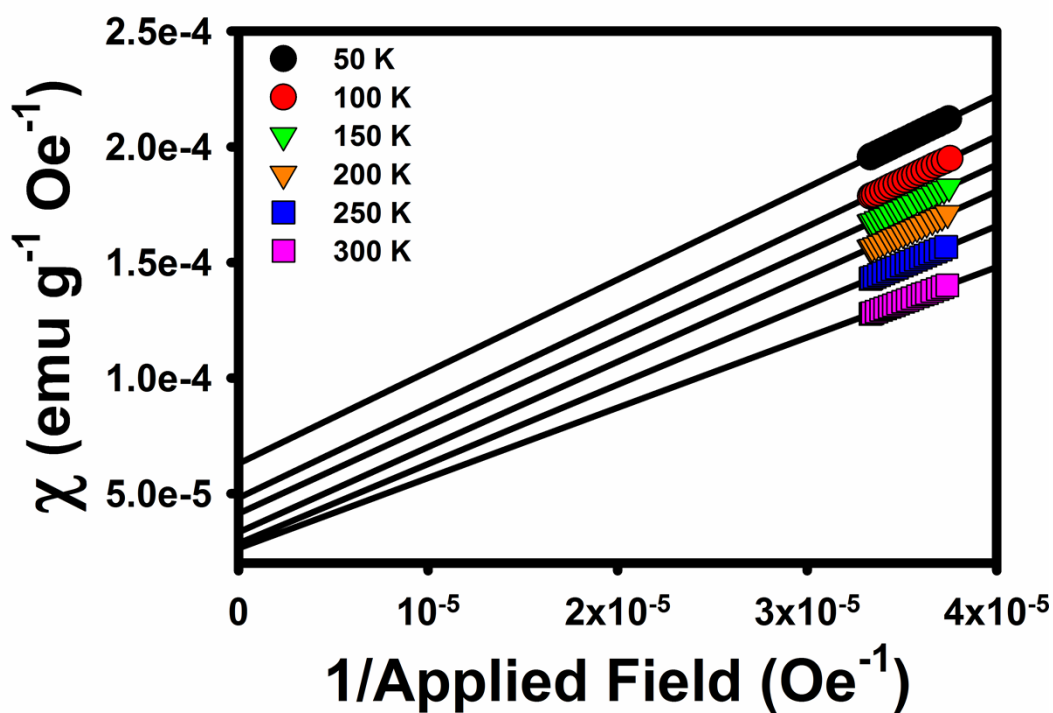

S7. Honda-Owens plots for CoO/Co<sub>2</sub>C samples synthesized in 10 mL 4-EG and 15 mL oleylamine for reaction times of 2 hours (top), and 4 hours (bottom).

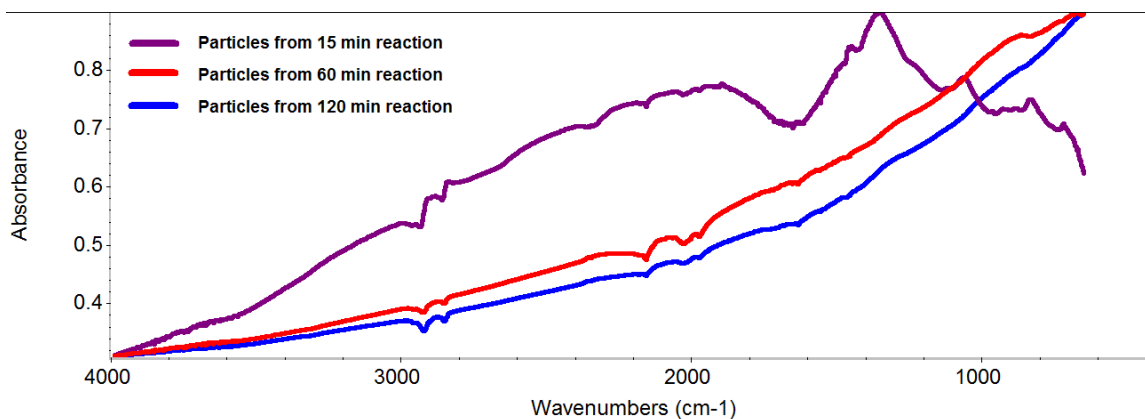

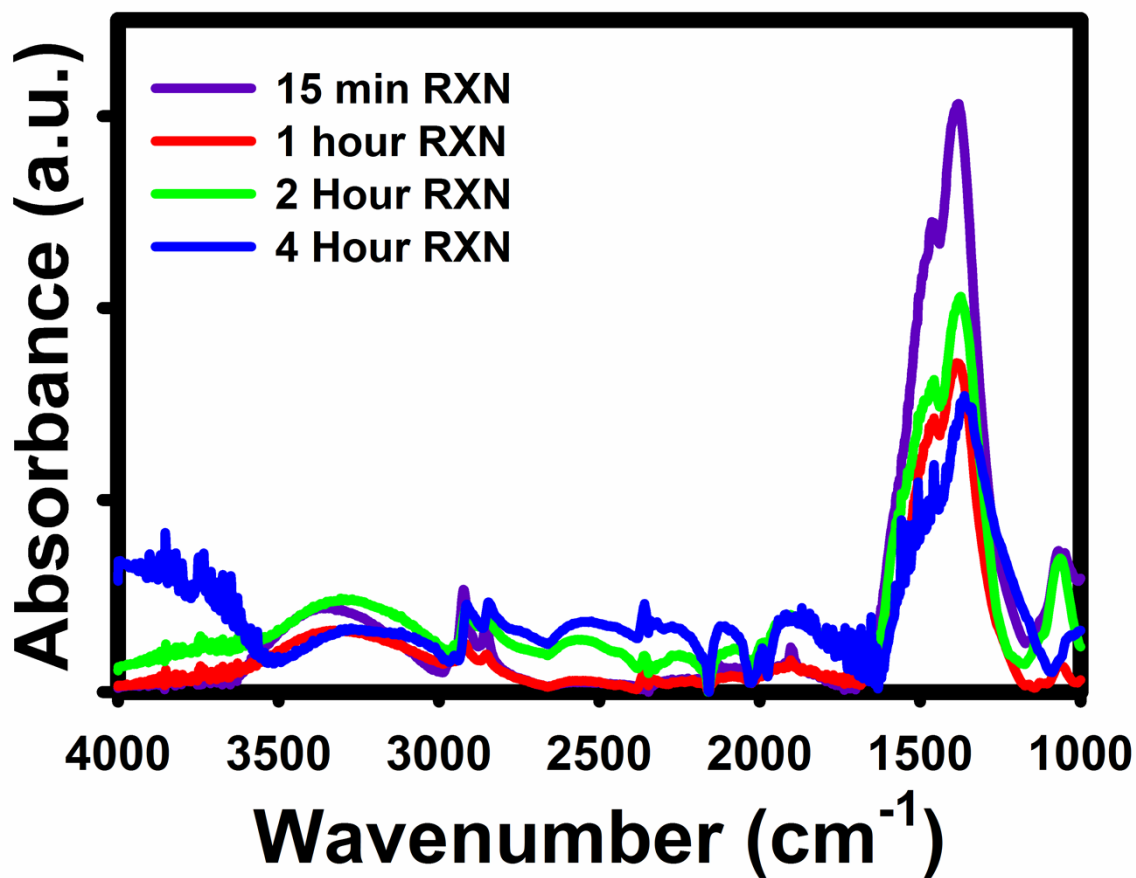

S8. FT-IR spectra of particles synthesized in 3-EG (top) and 4-EG (bottom) at various times

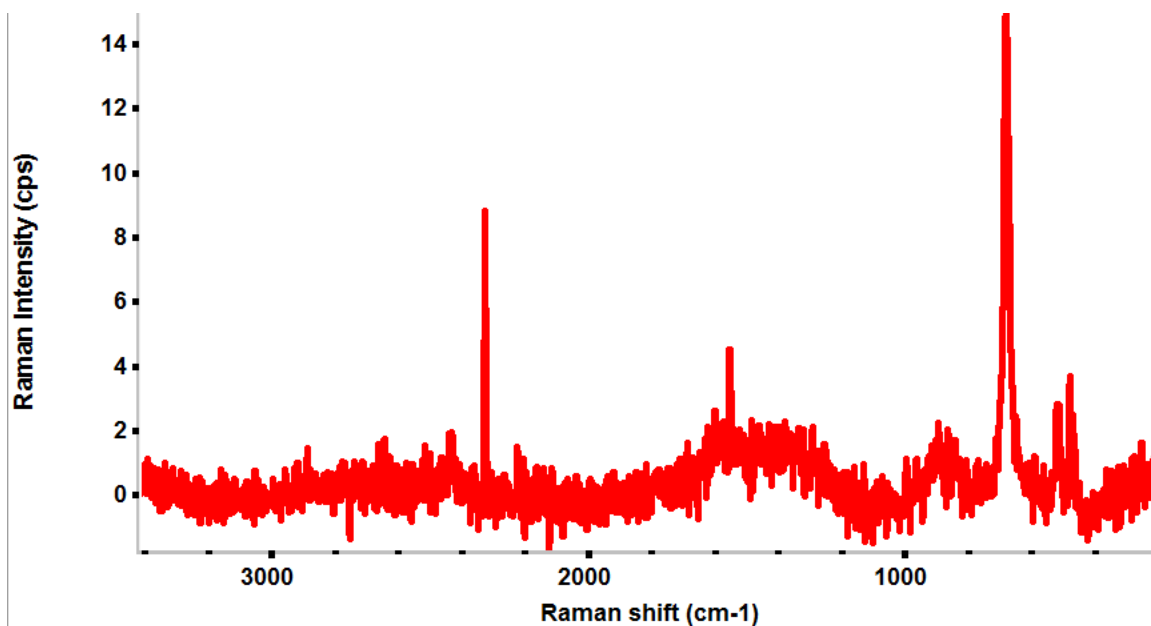

S9. Raman Spectra for particles showing 1-D structures in TEM images.

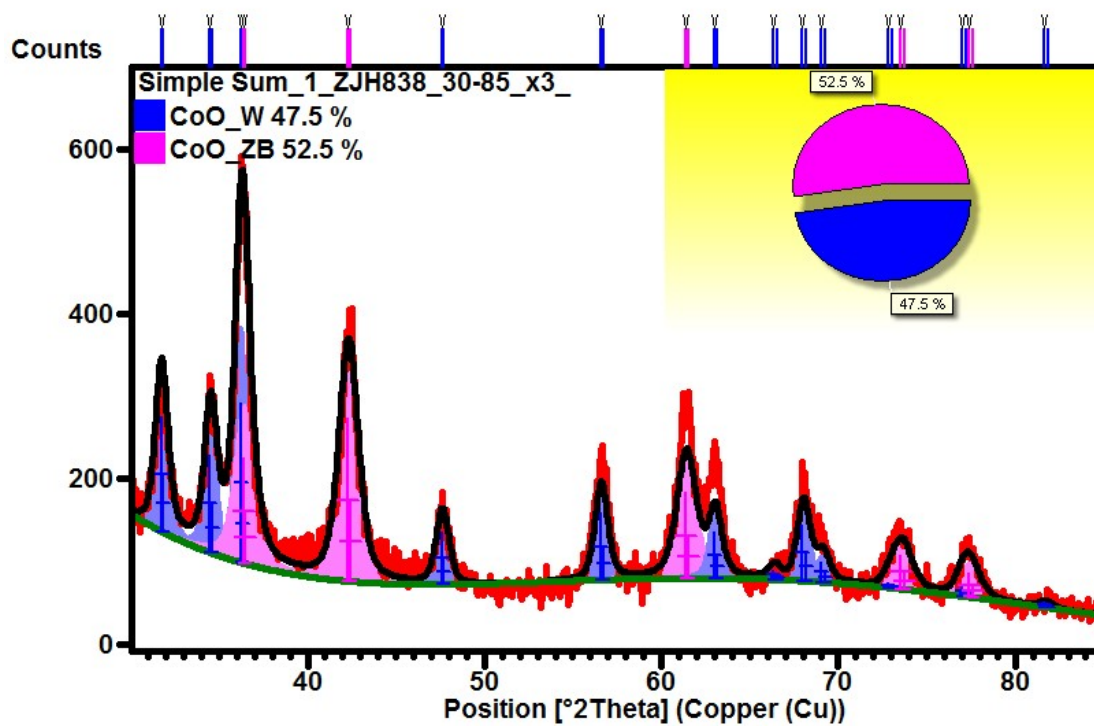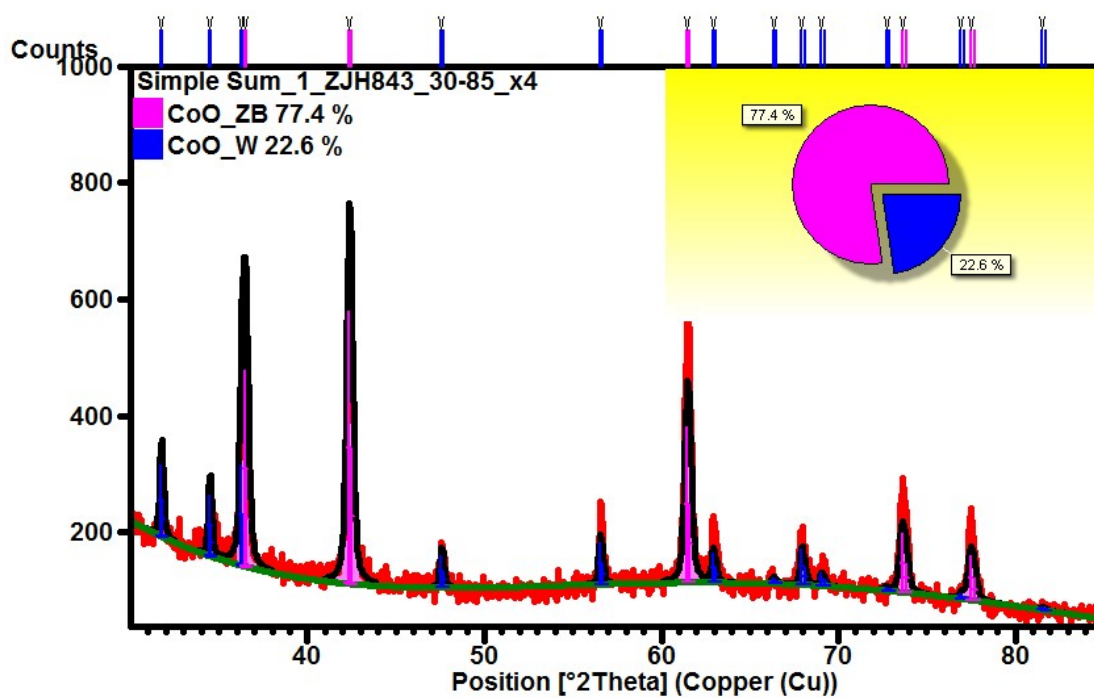

S10a. XRD patterns for samples prepared in just oleylamine at (top) 15 minute and (bottom) 2 hour reaction times

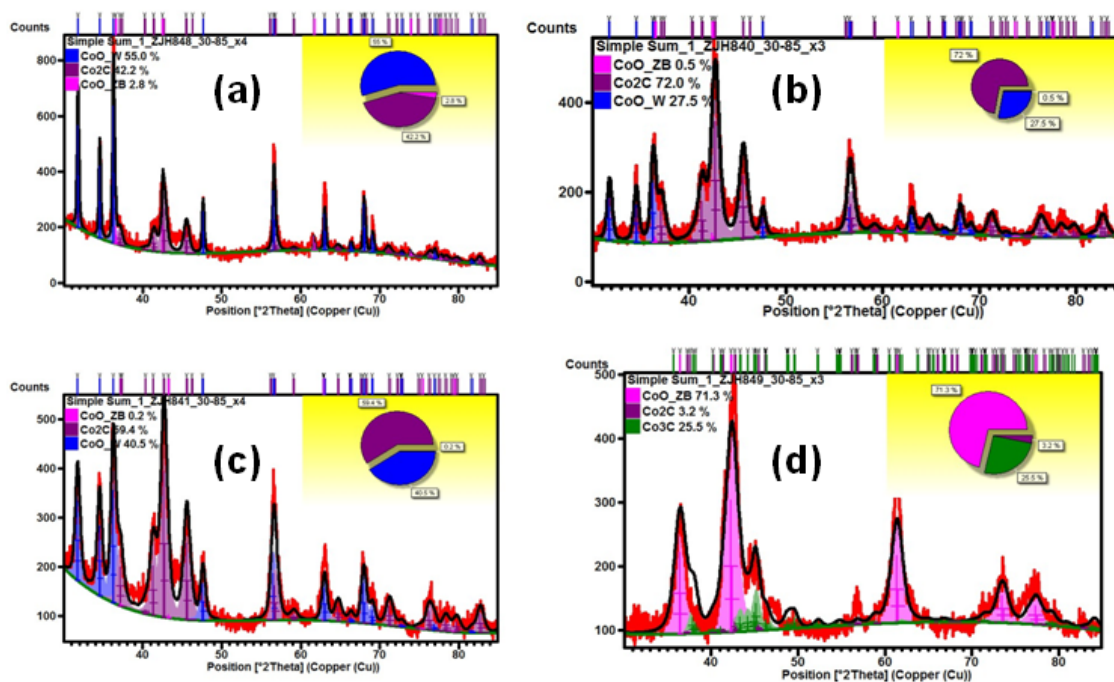

**S10b. XRD Patterns for samples synthesized at various ratios of Oam to 4-EG (corresponds to data in Figure 1(c)): (a) 22.5:2.5, (b) 20:5, (c) 15:10, and (d) 5:20. Data for the 10:15 ratio can be seen in Figure S1. All reactions were conducted for 2 hours.**
